# Supplementary material for: Years of life lost due to premature death and their trends in people with malignant neoplasm of female genital organs in Shanghai, China during 1995–2018: a population based study
Source: PubMed Central journal article supplement (PMC7528500; doi:10.1186/s12889-020-09593-6), 2020-10-01

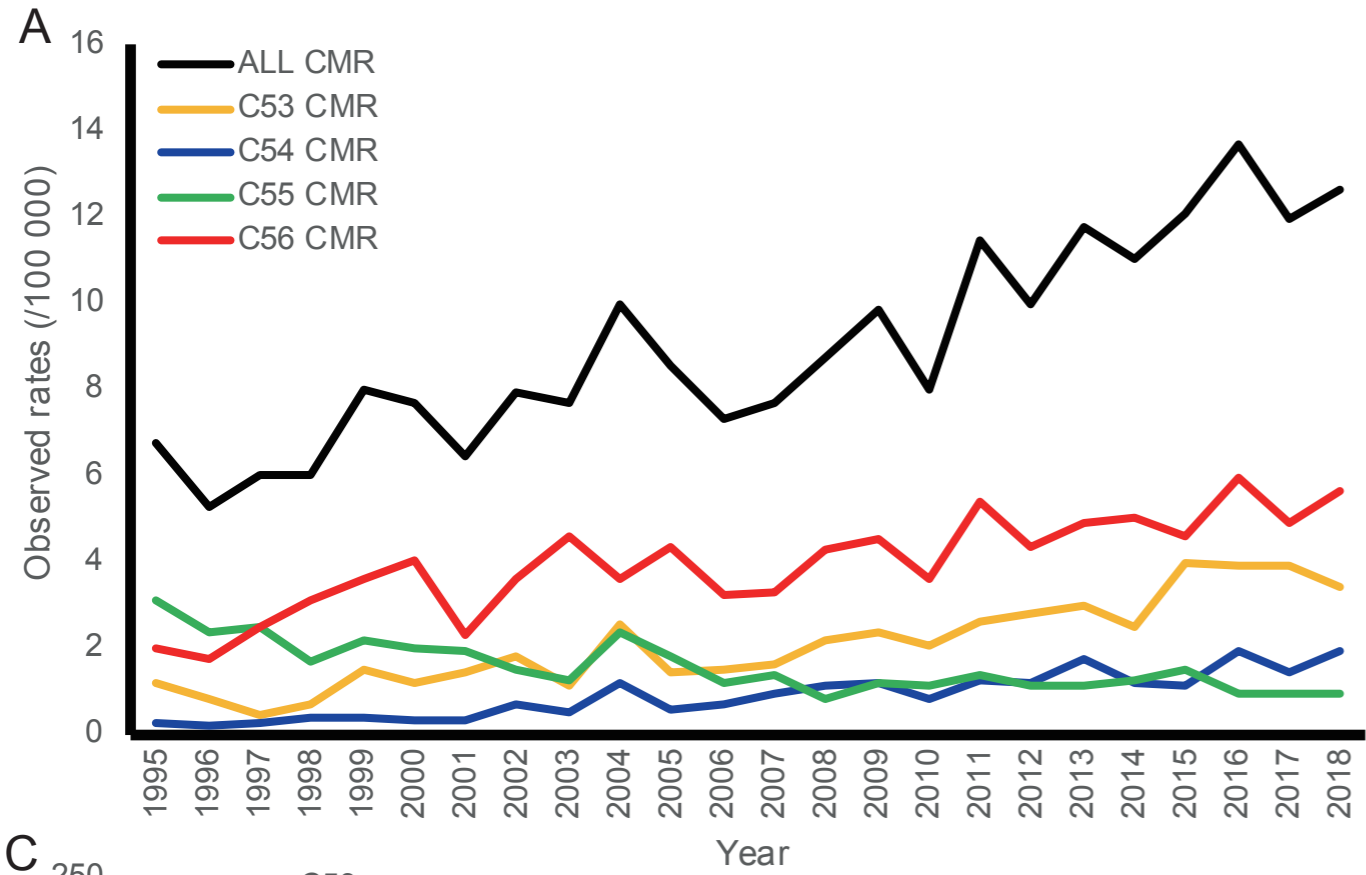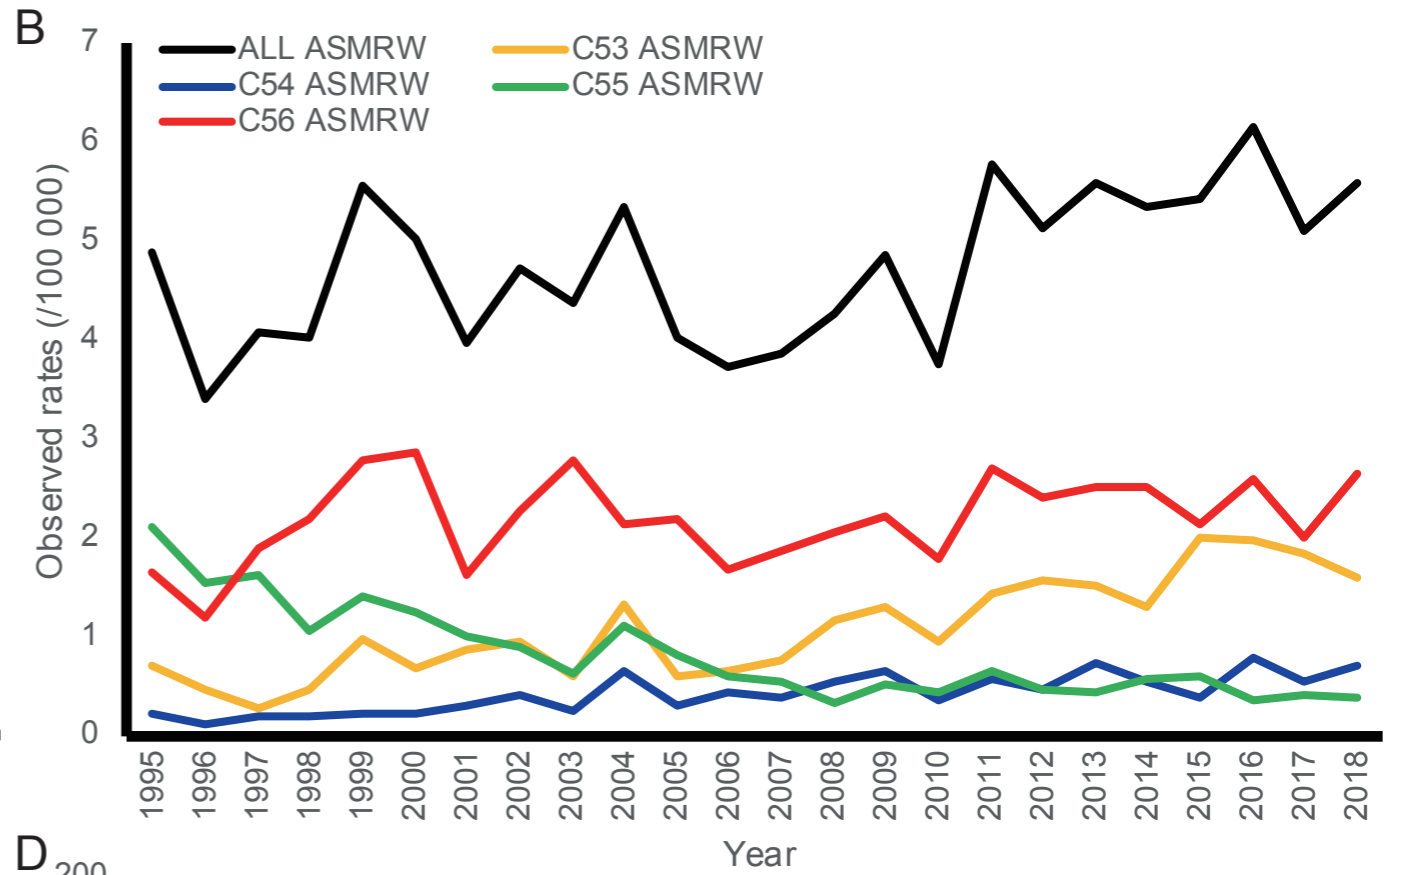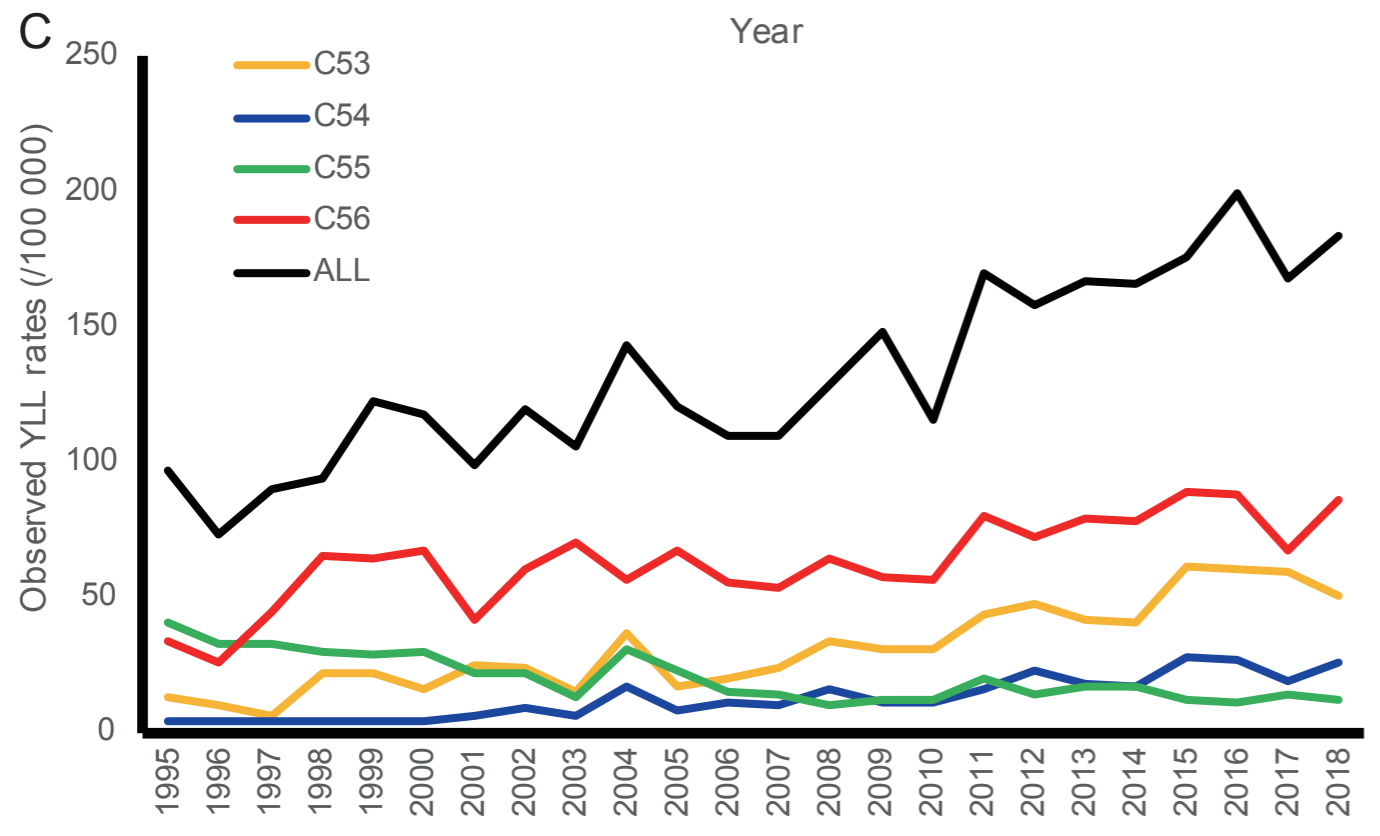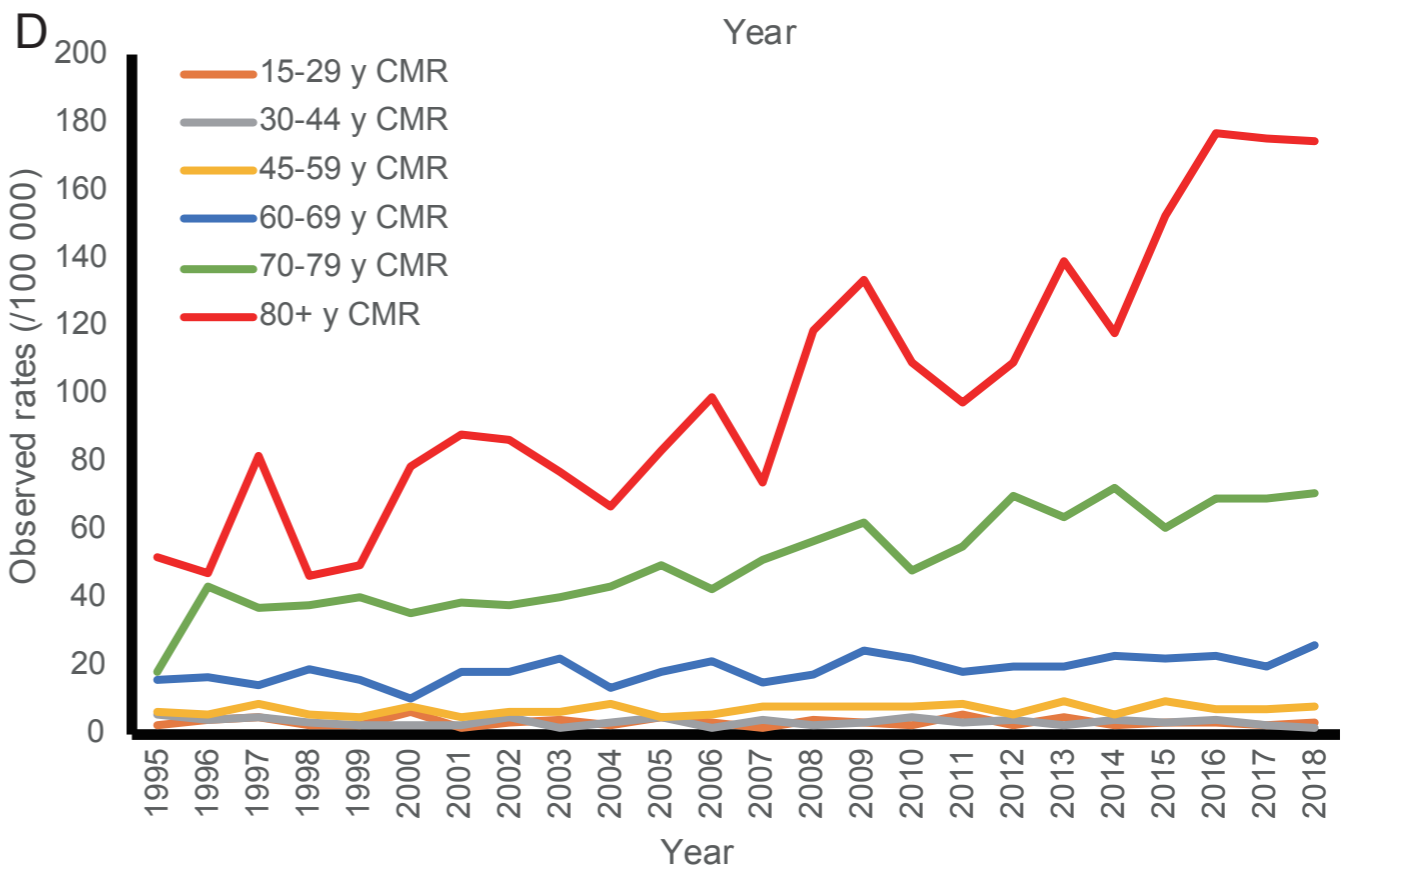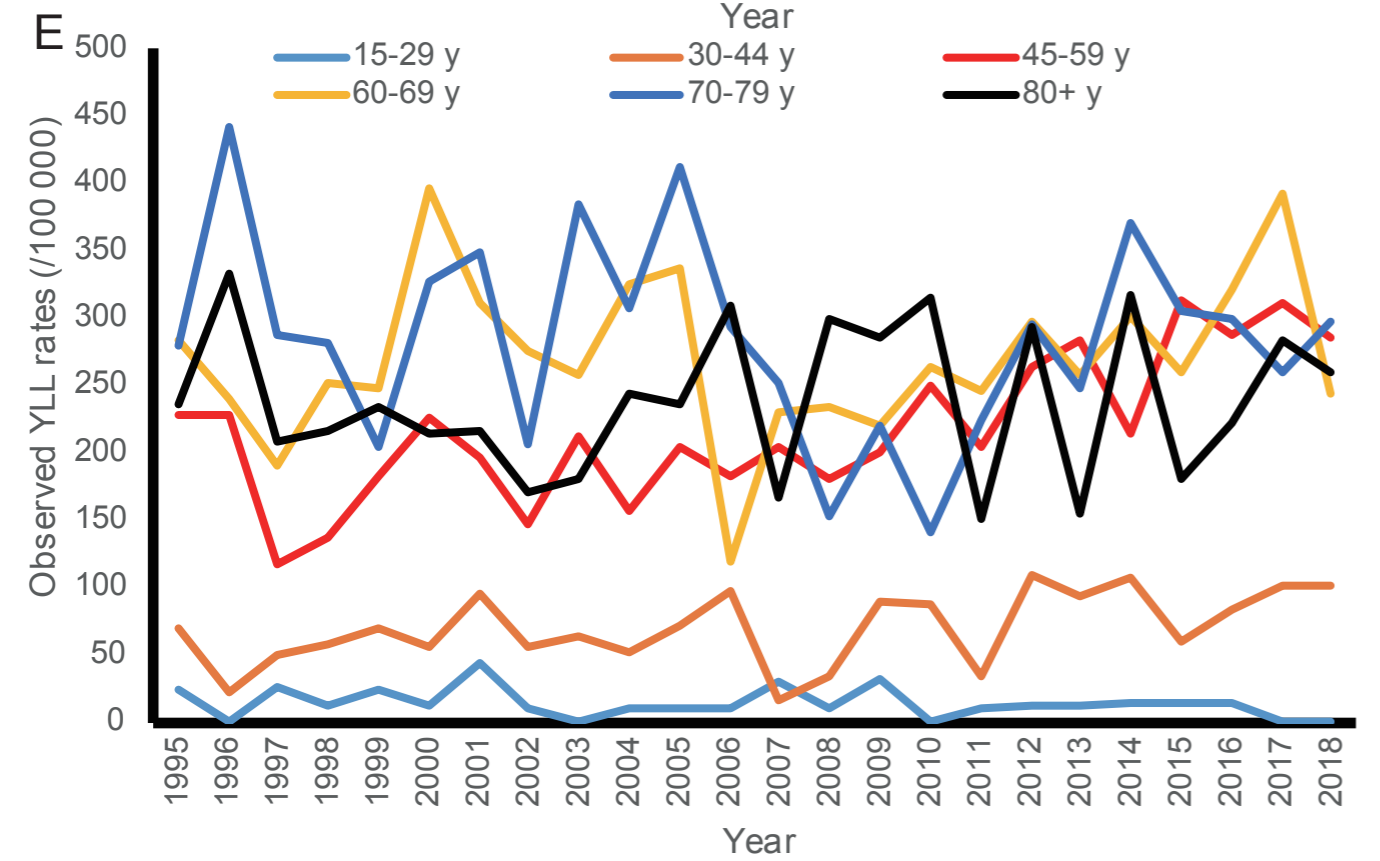

Supplement: 12889_2020_9593_MOESM4_ESM.pdf [file 12889_2020_9593_MOESM4_ESM.pdf]
